# Supplementary material
Source: PubMed Central journal article supplement (PMC3322888)
Supplement: supp_M111.331140_jbc.M111.331140-1.pdf [file supp_M111.331140_jbc.M111.331140-1.pdf]

**SUPPLEMENTAL FIGURES**

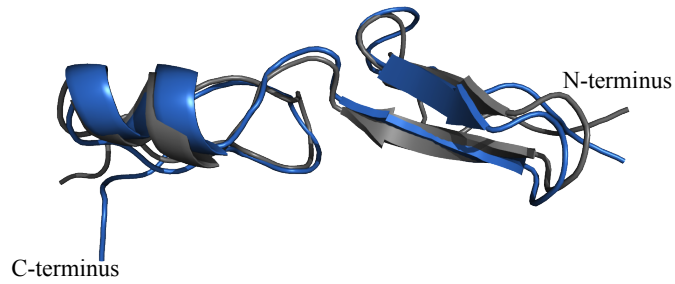

**Supplemental Figure 1:** The VEGF-A HBD structure. The VEGF-A HBD solution structure (gray, PDB=1KMX) shares a similar structural architecture with the current Nrp1 bound HBD structure (blue).

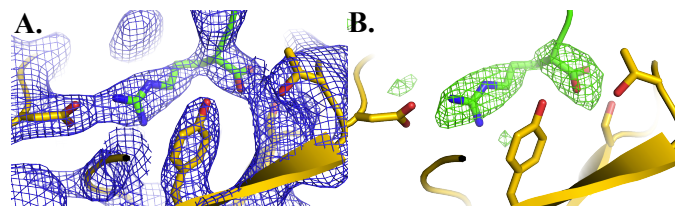

**Supplemental Figure 2:** Binding of the C-terminal arginine into the conserved Nrp1-b1 binding pocket reveals a conserved binding mode between both molecules in the asymmetric unit. (A) 2Fo-Fc electron density map contoured at 1.0 and (B) Fo-Fc omit electron density map contoured at 3.0 for R164 chain B.
